# Supplementary material for: An automated identification and analysis of ontological terms in gastrointestinal diseases and nutrition-related literature provides useful insights
Source: PeerJ. 2018 Jul 26;6:e5047. doi: 10.7717/peerj.5047 (PMC6064635; doi:10.7717/peerj.5047)
Supplement: Supplemental Information 2 — Four tables, Table_S2A (CCD), Table_S2B (CD), Table_S2C (IBS), and Table_S2D (UC) for differential expression analysis of nutrition-related terms between years using Kruskal-Wallis test. Only those terms are shown where the adjusted P-value (Padj) < 0.05. Mean expression indicates the mean document-based normalised frequency obtained for a specific term for each interval. [file peerj-06-5047-s002.xlsx]

## Sheet: KW_significant_using_only_nutri
Table_S2A (CCD)
	Kruskal-Wallis test		Mean Expression
Terms	P Value	Adjusted P Value (Padj)	1991 - 1992	1993 - 1994	1995 - 1996	1997 - 1998	1999 - 2000	2001 - 2002	2003 - 2004	2005 - 2006	2007 - 2008	2009 - 2010	2011 - 2012	2013 - 2014	2015 - 2016
banana	0.000157781	0.00242285	0	0	0	0	0	0	0	0	0	0	0.00726878	0	0
beta.galactosidase	0.000157781	0.00242285	0	0	0	0	0	0	0	0	0.00596834	0	0	0	0
bilirubin	0.000157781	0.00242285	0	0	0	0	0	0	0	0	0	0	0	0.00376539	0
butyrate.metabolism	0.000157781	0.00242285	0	0	0	0	0	0	0	0	0	0	0	0.00270551	0
canola	0.000157781	0.00242285	0	0	0	0	0	0	0	0	0	0.00440829	0	0	0
choline	0.000157781	0.00242285	0	0	0	0	0	0	0	0	0	0.00512207	0	0	0
egg.white	0.000157781	0.00242285	0	0	0	0	0	0	0	0	0	0	0	0.00270551	0
hyperbilirubinemia	0.000157781	0.00242285	0	0	0	0	0	0	0	0	0	0	0	0.00488107	0
iodine	0.000157781	0.00242285	0	0	0	0	0	0	0	0	0	0	0	0	0.00589196
iron.binding	0.000157781	0.00242285	0	0	0	0	0	0	0.0102605	0	0	0	0	0	0
isoflavone	0.000157781	0.00242285	0	0	0	0	0	0	0	0	0	0.00440829	0	0	0
lipoic.acid	0.000157781	0.00242285	0	0	0	0	0	0	0	0	0.00679753	0	0	0	0
lycopene	0.000157781	0.00242285	0	0	0	0	0	0	0	0	0	0.00440829	0	0	0
n.6.fatty.acids	0.000157781	0.00242285	0	0	0	0	0	0	0	0	0.00596834	0	0	0	0
protein.digestion	0.000157781	0.00242285	0	0	0	0	0	0	0	0	0	0	0	0	0.00550625
protein.x	0.000157781	0.00242285	0	0	0	0	0	0	0	0	0	0	0	0.00270551	0
pufa.eicosapentaenoic.acid	0.000157781	0.00242285	0	0	0	0	0	0	0	0	0	0	0	0.00270551	0
resveratrol	0.000157781	0.00242285	0	0	0	0	0	0	0	0	0	0.00440829	0	0	0
taurine	0.000157781	0.00242285	0.0171488	0	0	0	0	0	0	0	0	0	0	0	0
vitamin.b.6	0.000157781	0.00242285	0	0	0	0	0	0.00888545	0	0	0	0	0	0	0
vitamin.c	0.000157781	0.00242285	0	0	0	0	0	0	0	0	0	0	0	0.00270551	0
ffq	0.000169339	0.00242285	0	0	0	0	0	0	0	0	0	0	0	0.00270551	0.00227964
lipolysis	0.000169339	0.00242285	0	0	0	0	0	0	0	0	0	0	0.00363439	0.00270551	0
lipoprotein.lipase	0.000169339	0.00242285	0	0	0	0	0	0	0	0	0	0	0.00363439	0.00270551	0
regulation.of.energy.homeostasis	0.000169339	0.00242285	0	0	0	0	0	0	0	0	0	0.00440829	0.00363439	0	0
umami.taste.perception	0.000169339	0.00242285	0	0	0	0	0	0	0	0	0	0	0.00363439	0.00270551	0
fatty.acid.oxidation	0.00017752	0.00244583	0	0	0	0	0	0	0	0	0	0.00440829	0.00726878	0.00270551	0
bakeries	0.000251678	0.00334372	0	0	0	0	0	0	0	0	0	0.0100521	0.0160038	0.00648282	0.00921736
adiponectin	0.000533723	0.00684638	0	0	0	0	0	0	0	0	0	0	0.00363439	0.00323545	0.00133267
lysine	0.000649715	0.00805646	0	0	0	0	0	0	0	0	0	0.00440829	0.000575705	0.00484913	0
amaranth	0.000746678	0.00896013	0	0	0	0.00664251	0	0	0	0	0	0.00881659	0.0145376	0.00488107	0.00550625
fruit	0.00093179	0.0106597	0.0217191	0.010308	0	0	0	0	0	0	0	0.00440829	0.0120546	0.00377732	0.00693772
niacin	0.000960847	0.0106597	0	0	0	0	0	0	0	0	0	0.00881659	0	0.00163369	0
quinoa	0.000974272	0.0106597	0	0	0	0	0.008967	0	0.00907849	0	0	0.0213277	0.0102854	0.00541101	0.00371111
transglutaminase	0.00113832	0.0120987	0	0	0	0	0.012655	0.0440175	0.050732	0.0798708	0.0656785	0.0413485	0.0400522	0.0457904	0.0364856
riboflavin	0.00129551	0.0130845	0	0	0	0	0	0	0	0	0.000829187	0.00881659	0	0.00270551	0.00143147
lipid.metabolism	0.00134862	0.0130845	0	0	0	0	0	0	0	0	0.00328017	0	0.00784448	0.00323545	0.000484496
conjugated.linoleic.acid	0.00139711	0.0130845	0	0	0	0	0.00490196	0	0	0	0	0	0.00363439	0	0.00227964
dyslipidemia	0.00140694	0.0130845	0	0	0	0	0	0	0	0	0	0	0.00363439	0	0.000484496
rutin	0.00140694	0.0130845	0	0	0	0	0	0.00888545	0	0	0	0	0	0.00107181	0
manganese	0.00153146	0.0135644	0	0	0	0	0	0	0	0	0.00351736	0.00440829	0	0	0
pentanoic.acid	0.00153146	0.0135644	0	0	0	0	0	0	0	0	0.00351736	0	0	0.00270551	0
adipogenesis	0.00183942	0.0148753	0	0	0	0	0	0	0	0.00751229	0	0	0.00155039	0	0
anthocyanin	0.00183942	0.0148753	0	0	0	0	0	0	0	0	0	0.00440829	0	0	0.00094697
tomato	0.00183942	0.0148753	0	0	0	0	0	0	0	0	0	0.00440829	0	0.00107181	0
ttg2	0.00183942	0.0148753	0	0	0	0	0	0	0	0	0	0	0.00115141	0.00486914	0
ghrelin	0.00202869	0.0159584	0	0	0	0	0	0	0.00524707	0.0137226	0.00679753	0.00245898	0	0.00160175	0.00458131
steatorrhea	0.00205915	0.0159584	0.0363941	0.0876056	0.0363873	0.0476028	0.0498197	0.0538773	0.0138583	0.0031746	0.0094857	0.0017452	0.00155039	0.00213169	0.00242248
thiamin	0.00212143	0.0161055	0	0	0	0	0	0.003663	0.00907849	0	0.00351736	0.00881659	0.00363439	0.00922027	0.00227964
sodium	0.00223289	0.0166127	0	0	0	0	0	0	0	0.00657596	0	0.00194932	0.00665098	0.0091764	0.00589196
short.chain.fatty.acids	0.00234949	0.0171168	0	0	0.0140784	0	0	0	0	0.00433769	0	0	0.0027018	0.00700084	0.00179515
wheat.allergy	0.00239267	0.0171168	0	0	0	0	0.00641026	0.00115741	0	0.0113965	0.00865651	0.00532619	0.0140965	0.0285052	0.0755894
redox	0.00292491	0.0199263	0	0	0	0.00181159	0.0015083	0	0	0	0	0	0.00780239	0.00270551	0.00227964
egg.yolk	0.00300319	0.0199263	0	0	0	0	0	0	0	0	0	0	0.0015083	0	0.00276414
lutein	0.00300319	0.0199263	0	0	0	0	0	0	0	0	0.00245098	0.00440829	0	0	0
zeaxanthin	0.00300319	0.0199263	0	0	0	0	0	0	0	0	0.00245098	0.00440829	0	0	0
polyethyleneglycol	0.00305323	0.0199263	0	0.0197069	0	0	0	0.00522245	0	0	0	0	0	0	0.000484496
tryptophan	0.00316484	0.0202986	0.00209644	0	0	0	0	0	0	0.00844862	0	0	0	0.00107181	0.00227964
pyridoxal.5.phosphate	0.00341526	0.0212885	0	0	0	0	0	0.00888545	0	0.00411093	0.000829187	0	0	0	0
soybean	0.00351142	0.0212885	0	0	0	0	0	0	0	0	0	0.00440829	0.00305868	0	0.00179515
tissue.transglutaminase	0.00358615	0.0212885	0	0	0	0.0201782	0.0546389	0.0920717	0.105687	0.128332	0.118099	0.130799	0.129538	0.112687	0.108598
g.protein	0.00358729	0.0212885	0	0	0	0	0.0104753	0.00115741	0	0	0	0	0	0.00217556	0
cassava	0.00360532	0.0212885	0.00628931	0	0	0	0	0	0	0	0	0	0.00363439	0.00270551	0.00179515
fructans	0.00370273	0.0215221	0	0	0	0	0	0	0	0	0	0	0.004168	0.00160175	0.00562707
vitamin.b12	0.00410843	0.0235128	0.00838574	0	0.016136	0.0195743	0	0.0148633	0.00236407	0.00280899	0.00331675	0.0129072	0.00691189	0.00864646	0.00659606
obesity	0.00443576	0.0250016	0.0196226	0.010308	0.00617284	0.0129318	0.0015083	0	0.00118203	0.0319218	0.00924851	0.0102441	0.0344787	0.0417064	0.0552632
butyrate	0.00451936	0.0250926	0	0	0	0	0	0	0	0	0	0.00337687	0.000575705	0.00429533	0
pyridoxine	0.00481903	0.0263629	0	0	0	0	0	0	0	0.00411093	0	0.00266309	0	0.00270551	0
ttg	0.00494075	0.0266371	0	0	0	0.00664251	0.0633944	0.0411098	0.0580717	0.0636832	0.0625891	0.0674334	0.0778808	0.0938441	0.0723445
leptin	0.00521051	0.0272133	0	0	0	0	0	0	0.00789646	0.0178336	0.00410936	0.0061535	0.002084	0.00158983	0.00494499
copper	0.00526756	0.0272133	0	0.0209091	0.016136	0	0	0	0	0	0.00351736	0.000713776	0.00726878	0.00377732	0.00278616
hypochromic.anemia	0.0053448	0.0272133	0	0	0	0	0	0	0.0140919	0	0.000829187	0.000713776	0	0	0
phenylketonuria	0.00537706	0.0272133	0	0.00273224	0	0	0	0.00888545	0	0	0.00328017	0	0.000575705	0.00270551	0
intestinal.fatty.acid.binding.protein	0.00541339	0.0272133	0	0	0	0	0	0	0	0	0	0	0.00115141	0.00216364	0.00409681
peanut	0.00581303	0.0288326	0	0	0	0	0	0.00888545	0	0.0031746	0	0.0072755	0.00722668	0.00590901	0.00237844
potato	0.0061339	0.0300238	0	0	0.00584795	0	0.00490196	0	0	0	0	0.00440829	0.00363439	0.00270551	0.00322661
hydroxypropylmethyl.cellulose	0.00650297	0.0314169	0	0	0	0	0	0	0	0	0	0.00707139	0.0056763	0	0.00189394
glucose.homeostasis	0.00685083	0.0326732	0	0	0.00617284	0	0	0	0	0	0	0.00194932	0.00363439	0.00270551	0
lipase	0.00701104	0.033014	0.0108595	0.0442573	0.00996318	0.0228443	0.0183938	0.0152653	0.00383142	0	0.00245098	0.00245898	0.00576048	0	0.00227964
alpha.amylase.inhibitor	0.0075349	0.0350373	0.00666667	0	0	0	0	0	0	0	0	0	0.002084	0	0.00407479
antioxidant	0.00786375	0.036115	0	0	0.00205761	0.00362319	0.0015083	0.00522245	0.0129099	0	0.00762671	0.00583585	0.0156469	0.00968633	0.00875489
fermentation	0.00825942	0.0374696	0	0	0	0	0	0.00406504	0.00524707	0.0202107	0.0140694	0.0234811	0.0139198	0.0156392	0.00921736
food.products	0.00841243	0.0377039	0	0	0.00790557	0	0.00641026	0.0218359	0.0131435	0	0.0276279	0.0197866	0.0201718	0.0155634	0.0224422
oleate	0.00934852	0.0414006	0	0	0.0202512	0	0.00490196	0.00522245	0.00524707	0	0	0	0	0	0
vitamin.b	0.00954441	0.0415122	0	0	0	0	0	0.00482041	0	0.0031746	0.00576773	0.0132249	0.000575705	0.00323545	0.00227964
triacylglycerol	0.0095969	0.0415122	0.0167715	0.0197069	0.0260992	0	0.00490196	0	0.0143256	0.00433769	0	0.00337687	0.00669307	0.00756272	0.00504378
tyrosine.phosphatase	0.00994612	0.0422095	0	0	0	0	0.0015083	0.003663	0	0.0106869	0	0	0	0	0
carotene	0.0100831	0.0422095	0.00838574	0.00666667	0	0	0	0	0	0	0	0.00440829	0	0	0
mineralization	0.0100985	0.0422095	0	0.00273224	0	0.00181159	0.0119836	0.0100429	0.00236407	0	0	0.000713776	0	0.00160175	0
taste	0.010238	0.0423172	0	0.0142424	0.00790557	0	0.0015083	0	0.0195726	0	0.00268817	0.0061535	0.00669307	0.0107901	0.011497
docosahexaenoic.acid	0.0104402	0.0425291	0	0	0	0	0	0	0	0	0.00513915	0.000713776	0	0.00270551	0.00133267
homocysteine	0.0105179	0.0425291	0	0	0	0.0081009	0	0.0112003	0.00118203	0.00093633	0.00165837	0.00337687	0.00212609	0.00376539	0.00914059
d.xylose	0.0111138	0.0444551	0.0318239	0	0.00823045	0.00664251	0	0.00713523	0	0	0	0.00266309	0	0.00380926	0.000848176
arsenic	0.0117598	0.0465386	0	0	0	0	0	0	0	0	0.00351736	0	0.002084	0.00320351	0.00227964
galactosemia	0.0120963	0.0473664	0.00838574	0	0	0	0	0	0	0	0.00328017	0	0.000575705	0	0.00227964
methionin	0.0125057	0.0484597	0	0.0142424	0	0.0081009	0	0	0	0	0	0.00440829	0	0.00107181	0
sorghum	0.0127403	0.0488596	0.00666667	0.0151515	0	0.00483092	0	0	0	0	0	0.0154918	0	0.00698082	0.00227964
metalloproteinases	0.0129207	0.0489853	0	0	0	0	0	0	0	0.00093633	0	0.00440829	0.002084	0.00107181	0
body.fat	0.0130364	0.0489853	0.00209644	0	0	0	0.0160486	0.00115741	0	0.00187266	0.000829187	0.00440829	0.00363439	0.00323545	0.00133267
Table_S2B (CD)
	Kruskal-Wallis test		Mean Expression
Terms	P Value	Adjusted P Value (Padj)	1991 - 1992	1993 - 1994	1995 - 1996	1997 - 1998	1999 - 2000	2001 - 2002	2003 - 2004	2005 - 2006	2007 - 2008	2009 - 2010	2011 - 2012	2013 - 2014	2015 - 2016
apple	0.000157781	0.00296343	0	0	0	0	0	0	0	0	0	0.00963818	0	0	0
calcitonin	0.000157781	0.00296343	0	0	0	0	0	0	0	0	0	0	0.00548297	0	0
conjugated.linoleic.acid	0.000157781	0.00296343	0	0	0	0	0	0	0	0	0	0.00537096	0	0	0
delta.lactulose	0.000157781	0.00296343	0	0	0	0	0	0	0	0.00803082	0	0	0	0	0
ffa2	0.000157781	0.00296343	0	0	0	0	0	0	0	0	0	0	0	0	0.00363981
ffq	0.000157781	0.00296343	0	0	0	0	0	0	0	0	0	0.00537096	0	0	0
fructose.diet.induced	0.000157781	0.00296343	0	0	0	0	0	0	0	0	0	0	0	0.00372894	0
fruit.juices	0.000157781	0.00296343	0	0	0	0.0147106	0	0	0	0	0	0	0	0	0
galactosemia	0.000157781	0.00296343	0	0	0	0	0	0	0	0	0	0	0	0	0.00363981
gpr43	0.000157781	0.00296343	0	0	0	0	0	0	0	0	0	0	0	0	0.0145592
hypercalcemia	0.000157781	0.00296343	0	0	0	0	0	0	0	0	0	0.00537096	0	0	0
overnutrition	0.000157781	0.00296343	0	0	0	0	0	0	0	0	0	0	0	0	0.00363981
pollen	0.000157781	0.00296343	0	0	0	0	0	0	0	0	0	0	0	0.00372894	0
salmon	0.000157781	0.00296343	0	0	0	0	0	0	0	0	0	0.00537096	0	0	0
vitamin.c.transporter	0.000157781	0.00296343	0	0	0	0	0	0	0	0	0	0	0	0.00372894	0
acetic.acid.propionic.acid	0.000158137	0.00296343	0	0	0	0	0	0	0	0.00803082	0	0	0	0	0.00363981
broccoli	0.000158137	0.00296343	0	0	0	0	0	0	0	0	0	0.0107419	0	0	0.00363981
cocoa	0.000166582	0.00296343	0	0	0	0.0264972	0.0128177	0	0	0	0	0	0	0	0.00363981
riboflavin	0.000166582	0.00296343	0	0	0	0	0.0128177	0	0	0	0	0.00537096	0	0.00372894	0
banana	0.000169339	0.00296343	0	0	0	0	0	0	0	0.00803082	0	0.00537096	0	0	0
folate.metabolism	0.000169339	0.00296343	0	0	0	0	0	0	0	0	0.00725145	0.00537096	0	0	0
menaquinone.7	0.000169339	0.00296343	0	0	0	0	0	0	0	0	0.00725145	0.00537096	0	0	0
choline	0.000195945	0.00327995	0	0	0	0	0	0	0	0	0	0	0.00548297	0.00372894	0.00363981
fructans	0.000438011	0.00702642	0	0	0	0	0	0	0	0.0160616	0.00725145	0.00314874	0	0	0.00363981
safflower	0.000471297	0.00725797	0	0	0.0334689	0	0.0128177	0	0	0	0	0	0	0.00289142	0
cholecystokinin	0.000501463	0.00742551	0	0.0406652	0	0.0147106	0	0	0	0	0	0	0	0	0.00152207
vitamin.c	0.000543187	0.00774545	0	0	0	0.0147106	0	0	0.00203252	0.0193296	0	0	0.00979636	0.00372894	0.00363981
pyridoxine	0.000586303	0.00806167	0	0	0	0	0	0	0	0	0	0	0.00548297	0.00662036	0.00207486
soy	0.000628241	0.00834045	0	0.00358423	0	0	0.0128177	0	0.00962396	0	0	0	0	0	0.0041926
rye	0.000759343	0.00974491	0	0	0	0	0	0	0	0.0169485	0	0.00222222	0.00548297	0.00372894	0
hyperhomocysteinemia	0.000808526	0.0100414	0	0	0	0	0	0	0	0	0.00636875	0.0107419	0	0.00884101	0
haem	0.000960847	0.0108334	0	0	0	0	0	0	0.00962396	0	0	0	0	0.00234582	0
protein.metabolism	0.000960847	0.0108334	0.0312928	0	0	0	0	0	0	0	0.00481836	0	0	0	0
calcium.phosphate	0.000982749	0.0108334	0.00392157	0	0	0	0	0.0121368	0	0	0.00725145	0	0	0	0
kiwifruit	0.00109808	0.0108334	0	0	0	0	0	0	0	0	0	0.00537096	0	0.00222065	0
tomato	0.00109808	0.0108334	0	0	0	0.0147106	0	0	0	0.00609283	0	0	0	0	0
tgf.beta1	0.00110634	0.0108334	0	0	0	0	0.0128177	0	0	0	0.0120698	0.0042525	0.0168139	0.00389569	0.00267053
obesity	0.00114188	0.0108334	0	0	0	0	0.0069697	0.0025641	0	0.0112988	0.00570106	0.0120229	0.0180333	0.0322189	0.0418754
cyclooxygenase.2	0.00114419	0.0108334	0	0	0	0	0	0	0	0	0	0.00963818	0.0195678	0.000837521	0.00465196
succinic.acid	0.0012407	0.0108334	0	0	0	0	0	0	0	0	0	0	0	0.00289142	0.00516188
probiotic	0.00124254	0.0108334	0	0	0	0	0	0.0235897	0	0.00282486	0.0178187	0.0168769	0.00194932	0.00649519	0.00516188
glutathione.n.acetylcysteine	0.00130875	0.0108334	0	0	0	0	0	0	0	0.00803082	0.00481836	0	0	0	0
aluminosilicate	0.00131969	0.0108334	0	0	0.00900901	0	0	0.0121368	0	0	0	0	0	0.00372894	0
protein.catabolism	0.00132609	0.0108334	0.0215288	0.0203326	0	0	0	0	0	0	0	0.00110375	0.00116959	0	0
prealbumin	0.00139552	0.0108334	0.00947712	0	0.0220536	0.0147106	0	0	0.00962396	0	0	0.00110375	0	0.00167504	0.00571467
calcium.chloride	0.00140694	0.0108334	0.0352144	0	0	0	0	0	0	0	0	0	0	0	0.00156495
carbohydrate.metabolism	0.00140694	0.0108334	0	0	0.0185075	0	0	0	0	0	0	0	0.00116959	0	0
cck	0.00140694	0.0108334	0	0	0	0.0147106	0	0	0	0	0	0.00222222	0	0	0
creatine.phosphokinase	0.00140694	0.0108334	0	0	0	0.0147106	0	0	0	0	0	0	0	0.0015083	0
walnuts	0.00140694	0.0108334	0	0	0	0	0.0128177	0	0	0	0	0	0	0	0.00152207
taste	0.00150848	0.0113876	0	0.0167484	0.037015	0	0	0.0121368	0.00759144	0	0	0.00537096	0	0	0
vitamin.d	0.00168378	0.0124241	0.0133987	0.0107527	0.0548721	0.0195246	0.0203934	0.0307692	0.0485617	0.0535557	0.00553387	0.0579474	0.12299	0.137012	0.110572
potato	0.00174533	0.0124241	0.0176072	0	0.0149614	0	0	0	0	0.0132368	0	0.00537096	0.00431338	0	0.00363981
butyrate	0.00179139	0.0124241	0	0.00358423	0	0	0.0197873	0.0191453	0	0.0160616	0.00481836	0.0162901	0.0109659	0.0156281	0.0258951
cholinesterase	0.00180857	0.0124241	0.0120516	0	0	0	0	0	0	0	0	0	0	0	0.00363981
protein.digestion	0.00180857	0.0124241	0	0	0	0	0	0	0.00600077	0	0	0	0	0.00372894	0
taurine	0.00183942	0.0124241	0	0	0	0	0	0	0	0	0	0.00537096	0	0.0015083	0
maize	0.00221585	0.0140441	0	0	0	0.0211208	0.0128177	0.00957265	0	0.00564972	0	0.0161129	0	0	0
low.fat	0.00225917	0.0140441	0.0189542	0.0378057	0.0405611	0.0347975	0	0.0345299	0.00962396	0	0.0282903	0.00537096	0.01333	0.00372894	0.00211774
copper	0.002278	0.0140441	0	0.0133882	0.0275165	0.0147106	0.00252525	0	0	0.0160616	0.00155039	0	0.00548297	0	0.00363981
barley	0.00228129	0.0140441	0	0	0	0	0	0	0	0.00803082	0	0.00222222	0.00548297	0.00662036	0.00613116
wheat	0.00230646	0.0140441	0	0	0	0.0211208	0	0.0102564	0	0.0217114	0	0.0118604	0.00548297	0.0108949	0.0133679
vitamin.k	0.00234351	0.0140441	0	0	0	0.0176346	0	0.00512821	0.013689	0.00803082	0.0145029	0.00759319	0.00233918	0.00456646	0.00207486
een	0.00236817	0.0140441	0	0	0	0	0	0	0	0	0	0	0	0.00167504	0.00575754
short.chain.fatty.acids	0.00237109	0.0140441	0	0.00358423	0.0185075	0.0176346	0	0.00769231	0.0249036	0.0127937	0.00155039	0	0.00116959	0.00444129	0.0041926
magnesium	0.00243463	0.0141134	0	0.00716846	0.0465135	0.0377215	0.0256353	0.00512821	0	0.0112988	0.00155039	0.00537096	0	0.00456646	0.0103666
sucrose	0.0024561	0.0141134	0.0136856	0	0	0.0347975	0.00584795	0.0217094	0.0172154	0	0	0.0138907	0	0.0015083	0
n.6.fatty.acids	0.00256109	0.014463	0	0	0.0035461	0	0.0128177	0.0249573	0.00565571	0.0099688	0.020204	0	0.00548297	0.00674553	0.00211774
vitamin.b12	0.00262611	0.014463	0	0	0	0.00292398	0.032605	0.0025641	0.0156247	0.00193798	0.00791914	0.00869694	0.0168388	0.00594959	0.00783241
skeletal.muscle	0.00265876	0.014463	0	0	0	0.0147106	0	0	0	0.00803082	0.00155039	0.00204499	0	0.00485838	0.00631034
beta.catenin	0.00266721	0.014463	0	0	0	0	0	0	0	0	0.00155039	0.00110375	0.00784704	0.00372894	0
tgf.beta2	0.00285619	0.0152727	0	0	0	0	0.0256353	0.0191453	0.00600077	0.00476284	0.0145029	0.00220751	0	0.00222065	0.00423547
curcumin	0.00293733	0.0154914	0	0	0	0	0	0	0.00759144	0.00282486	0.0120698	0.0118457	0.0042885	0.0106412	0.0211069
ginger	0.00300319	0.0156247	0	0	0	0	0	0	0.00362319	0	0	0.00537096	0	0	0
bisulfite	0.0030963	0.0158407	0	0	0	0	0	0	0	0	0.00398348	0	0.00194932	0.00800349	0.00363981
alpha.1.antitrypsin	0.00316484	0.0158407	0.0215288	0	0.0070922	0	0	0	0	0	0	0	0.00236407	0	0.00363981
carrageenan	0.00316815	0.0158407	0.0176072	0	0	0	0	0	0	0.00609283	0.00570106	0.00759319	0	0	0.00152207
phosphorus	0.00331994	0.0163869	0	0.00358423	0	0.00830032	0.0128177	0	0	0	0	0	0	0.00662036	0
selenium	0.00358868	0.0173126	0.00392157	0.0344455	0	0.0112243	0.0248379	0	0.0212804	0.00520596	0.00155039	0	0.00116959	0.00427455	0.00727961
fruit	0.00360565	0.0173126	0	0	0	0.0412078	0	0.0261538	0.00962396	0.0212676	0.0226371	0.0237061	0.0274398	0.0134075	0.0279623
caffeine	0.00364238	0.0173126	0	0	0.0185075	0	0	0	0	0	0.00326797	0	0.00548297	0.00289142	0.00308702
sodium	0.00417341	0.0195947	0.0254503	0.00358423	0.0315521	0	0.0069697	0	0.00396825	0.0173916	0.00155039	0.0109192	0.0121355	0.0134075	0.0151549
plant	0.00445172	0.0206496	0	0	0	0	0	0.00444444	0	0.00282486	0.0129525	0.0224251	0.00979636	0.00511207	0.0123052
glutamine	0.00458613	0.0208535	0.0133987	0	0.037015	0.0264972	0.0153429	0.0249573	0.023313	0.0355561	0.00863464	0.00962346	0.0109411	0.00234582	0.00631034
vitamin.d.receptor	0.00461477	0.0208535	0	0	0	0	0	0	0	0.00282486	0.00243309	0	0	0.00662036	0.00363981
starch	0.00465818	0.0208535	0	0	0.0519764	0.00641026	0	0	0	0.00326797	0.00326797	0.0194389	0.00784704	0.00812866	0.00152207
serum.albumin	0.00474727	0.021008	0	0.0442494	0.0185075	0.00584795	0	0.0121368	0.0116565	0.00193798	0.0119026	0.00331126	0.0109659	0.00251256	0.00640376
d.xylose	0.00488	0.02135	0.00392157	0	0	0	0	0	0	0.00803082	0.00310078	0.00759319	0	0	0
ghrelin	0.0053448	0.0223894	0	0	0	0	0	0	0	0	0.0127853	0.00204499	0.00116959	0	0
homocysteine.metabolism	0.0053448	0.0223894	0	0	0	0	0.0128177	0	0	0	0.00155039	0	0.00116959	0	0
redox	0.0053448	0.0223894	0	0	0	0	0	0	0	0.00803082	0	0	0	0.0015083	0.000552792
vitamin.b.6	0.0053502	0.0223894	0	0	0	0	0	0	0	0	0.00481836	0.00332597	0	0.00372894	0
potassium	0.00551882	0.0228467	0.0352144	0.00358423	0.00949848	0.0205585	0	0	0	0	0.00310078	0.00537096	0.00548297	0.00372894	0.00211774
fructose	0.00577397	0.0234949	0	0	0	0.0147106	0.00584795	0.00957265	0	0	0	0.0225876	0.00311891	0.0015083	0
osteocalcin	0.00579744	0.0234949	0	0	0.00595238	0	0.00252525	0.0025641	0.0156247	0.0208245	0.00725145	0.00537096	0.00116959	0.00372894	0
deoxypyridinoline	0.00596035	0.0239035	0	0	0	0	0.00252525	0	0.00600077	0.00803082	0	0	0	0	0
nitric.oxide	0.00622709	0.0247158	0	0	0	0.0117866	0.0128177	0.0025641	0	0	0.00155039	0.00869694	0.00743229	0.00678711	0.00626746
digestion	0.00635191	0.0249539	0.0368484	0.00980392	0	0	0	0.0025641	0.0116565	0	0.0112349	0.00537096	0.00470325	0.00251256	0.0109194
hypoglycaemia	0.00662153	0.0257504	0	0	0.0185075	0	0.00584795	0	0	0	0	0	0	0.000837521	0
iron.deficiency.anemia	0.00669417	0.0257726	0	0	0	0	0	0.00769231	0.00203252	0	0.00155039	0.00537096	0.00784704	0	0.00474539
aluminium	0.0070737	0.0269641	0	0	0.00900901	0	0	0	0	0	0.00725145	0	0.0141097	0.00289142	0.00152207
rice	0.00723732	0.0270903	0.0176072	0	0	0	0	0	0	0	0.00570106	0	0.00236407	0.00138313	0
benzoic.acid	0.00724753	0.0270903	0	0.0461601	0	0	0	0	0	0	0	0.00222222	0	0.00523724	0
antioxidant	0.00737302	0.0272944	0	0	0.00900901	0.0112243	0.0515949	0.0275214	0.0328401	0.039711	0.0186058	0.0107272	0.0324831	0.0149158	0.0180704
xylose	0.0075349	0.027628	0	0	0	0	0.00444444	0	0	0.00803082	0	0	0.00431338	0	0
lipid.metabolism	0.00781535	0.0283483	0.00555556	0	0	0	0	0	0	0.00326797	0.0193213	0	0.00548297	0.0015083	0
folate	0.00787863	0.0283483	0	0.0203326	0	0.0235732	0.00252525	0.00512821	0.0272812	0.00476284	0.0353267	0.0260908	0.035237	0.0259359	0.0129943
fermentation	0.00814382	0.0287461	0	0.00694444	0	0	0.0172621	0.0147009	0.00565571	0.0301853	0	0.0127869	0.00860188	0.00594959	0.00207486
malondialdehyde	0.00821272	0.0287461	0	0	0	0	0.00252525	0	0	0	0	0	0.00548297	0	0.00465196
creatinine	0.00821316	0.0287461	0.0296589	0.00358423	0	0.00537634	0	0	0.0156247	0.0141236	0.00155039	0	0.00470325	0.00385411	0.00152207
oleate	0.00854304	0.0296312	0.0136856	0	0	0.0147106	0.00252525	0.0121368	0.00396825	0	0	0.00222222	0	0	0
polyethyleneglycol	0.008656	0.029755	0.00555556	0.0203326	0	0	0	0	0	0	0.00155039	0	0.00116959	0.00607476	0.000552792
maltodextrin	0.00900742	0.030689	0	0	0	0	0	0	0	0	0.00481836	0.00331126	0.00548297	0.00234582	0.00363981
metabolism	0.00924387	0.0312183	0.00947712	0.0141129	0.00949848	0.0234825	0.0632908	0.0121368	0.0192479	0.0160616	0.0472294	0.0218089	0.0512712	0.0210321	0.0303098
niacin	0.00970529	0.0324916	0	0.0133882	0	0	0	0	0	0.00803082	0	0.00537096	0.00389864	0.00138313	0
cabbage	0.00979887	0.0325221	0	0	0	0	0	0.00888889	0	0.00803082	0	0.00110375	0	0	0
osteomalacia	0.0102662	0.0337819	0	0	0.0119048	0	0	0	0	0	0	0.0105647	0	0.00289142	0.00211774
homocysteine	0.0107102	0.0349444	0	0	0	0	0.0128177	0	0.00600077	0	0.00946952	0.00442973	0.00782216	0.00289142	0.00156495
carotene	0.0112066	0.0362566	0	0.0133882	0	0.00830032	0.0318075	0.0025641	0.00759144	0.00803082	0.00155039	0	0.00784704	0	0
niddm	0.0114673	0.0367909	0	0	0	0	0	0	0	0	0	0.00222222	0.00548297	0.00222065	0.00308702
acrodermatitis.enteropathica	0.011943	0.0380005	0	0	0	0.00292398	0	0	0.00203252	0	0	0.00537096	0	0	0
glucose	0.0125143	0.0394918	0.0483262	0	0.0165907	0	0.0242318	0.0025641	0.00600077	0.00520596	0.00636875	0.0120229	0.00236407	0.00997045	0.00363981
tgf.beta	0.0127586	0.0398594	0	0	0	0.00641026	0.0128177	0.00444444	0.00759144	0.0284115	0	0.0105647	0.00860188	0.00817024	0.00373324
nitric.oxide.synthase	0.013673	0.0398594	0	0	0	0	0.00252525	0.00444444	0.0132472	0.00193798	0	0	0	0.00305817	0.00727961
docosahexaenoic.acid	0.0143551	0.0398594	0.0136856	0	0	0	0.0128177	0.00769231	0.00962396	0.00714394	0	0	0.0109659	0.0118576	0.00727961
soybean	0.0147698	0.0398594	0	0	0	0.00292398	0.0128177	0	0	0.0121857	0	0.00426721	0	0.00222065	0
titanium.dioxide	0.0147945	0.0398594	0	0	0.00900901	0	0.00444444	0.0121368	0.00962396	0	0.00725145	0	0.00862677	0.00662036	0
omega.3.fatty.acids	0.0148147	0.0398594	0.00555556	0	0.0334689	0	0.0197873	0.0121368	0	0.00908193	0.0120698	0.0129642	0.00431338	0.0101826	0.00308702
fatty.acid.metabolism	0.0150967	0.0398594	0	0	0.0035461	0	0.0102924	0	0	0	0.00155039	0.00741595	0	0.00607476	0.000552792
thiamin	0.01511	0.0398594	0.00392157	0	0	0.00933423	0	0.0025641	0	0	0	0.00537096	0	0.00456646	0.0041926
spice	0.0158389	0.0398594	0	0	0	0	0	0	0	0	0.00326797	0.00537096	0.00311891	0.000837521	0
lipid.oxidation	0.0165033	0.0398594	0	0	0.00595238	0.00830032	0.0223126	0.00512821	0	0	0.00481836	0	0	0	0
5.methyl.tetrahydrofolate	0.0166685	0.0398594	0	0	0	0	0	0	0.0120015	0	0	0	0	0	0
acetylcholine	0.0166685	0.0398594	0.0136856	0	0	0	0	0	0	0	0	0	0	0	0
alpha.lactalbumin	0.0166685	0.0398594	0	0	0	0	0	0	0	0	0	0	0	0.00222065	0
berries	0.0166685	0.0398594	0	0	0	0	0	0	0	0	0	0	0	0	0.00308702
bone.matrix	0.0166685	0.0398594	0	0	0	0	0	0	0	0	0	0	0	0.00289142	0
canola	0.0166685	0.0398594	0	0	0	0	0	0	0	0	0	0	0	0.00289142	0
carbohydrate.fermentation	0.0166685	0.0398594	0	0	0	0	0	0	0	0	0	0	0	0.00222065	0
carrot	0.0166685	0.0398594	0	0	0	0	0	0	0	0	0	0	0.00431338	0	0
cellobiose	0.0166685	0.0398594	0.0136856	0	0	0	0	0	0	0	0	0	0	0	0
cellulose	0.0166685	0.0398594	0	0	0	0	0	0	0	0	0	0	0	0.00289142	0
egg.white	0.0166685	0.0398594	0	0	0	0	0	0	0	0.00609283	0	0	0	0	0
g.fat	0.0166685	0.0398594	0.00947712	0	0	0	0	0	0	0	0	0	0	0	0
glucans	0.0166685	0.0398594	0.00947712	0	0	0	0	0	0	0	0	0	0	0	0
glutathione.reductase	0.0166685	0.0398594	0	0.0167484	0	0	0	0	0	0	0	0	0	0	0
growth.plates	0.0166685	0.0398594	0	0	0	0	0	0	0	0	0.00481836	0	0	0	0
hypophosphatemia	0.0166685	0.0398594	0	0.0169724	0	0	0	0	0	0	0	0	0	0	0
hypopituitarism	0.0166685	0.0398594	0	0	0	0	0	0.00769231	0	0	0	0	0	0	0
iron.fe	0.0166685	0.0398594	0	0	0	0	0	0	0.00759144	0	0	0	0	0	0
leucine	0.0166685	0.0398594	0	0	0	0	0	0	0	0	0.00481836	0	0	0	0
manganese	0.0166685	0.0398594	0	0	0	0.00830032	0	0	0	0	0	0	0	0	0
muscle.wasting	0.0166685	0.0398594	0	0	0	0	0	0	0	0	0	0	0	0	0.00460909
nacl	0.0166685	0.0398594	0	0	0	0	0	0	0	0	0	0	0	0	0.00308702
nitrate	0.0166685	0.0398594	0	0	0	0.0117866	0	0	0	0	0	0	0	0	0
peanut.allergy	0.0166685	0.0398594	0	0	0	0	0	0	0	0	0	0.00426721	0	0	0
phosphate.metabolism	0.0166685	0.0398594	0	0	0	0	0	0	0	0	0	0	0	0.00289142	0
quercetin	0.0166685	0.0398594	0	0	0	0	0	0	0	0	0	0.0063122	0	0	0
response.to.nutrient	0.0166685	0.0398594	0	0	0	0	0	0	0	0	0	0	0	0.00234582	0
vitamin.b2	0.0166685	0.0398594	0	0.0133882	0	0	0	0	0	0	0	0	0	0	0
wheat.allergy	0.0166685	0.0398594	0	0	0	0	0	0	0	0	0	0	0	0	0.00460909
glycine	0.0168803	0.0401168	0	0	0	0	0.00837321	0	0	0	0.00155039	0.00759319	0.00236407	0	0
galactose	0.0171209	0.0404388	0	0.00694444	0	0	0	0.00512821	0	0	0	0	0	0.00372894	0
cobalamin.deficiency	0.0179951	0.0422446	0.0136856	0	0	0	0.0128177	0	0	0.00193798	0.00243309	0.00204499	0.00548297	0	0.000552792
bone.resorption	0.0187681	0.0437923	0	0	0	0.00830032	0.00252525	0	0.00962396	0.0193296	0.00155039	0.00332597	0.00353366	0.000837521	0.000552792
silicate	0.0200288	0.045327	0.0136856	0	0.00900901	0	0	0	0.00962396	0	0.00725145	0	0.00862677	0.00289142	0
aloe.vera	0.0211685	0.045327	0	0	0	0	0	0	0	0	0	0	0	0.00289142	0.00921817
catechin	0.0211685	0.045327	0	0	0	0	0	0	0	0	0	0.00426721	0	0	0.00308702
chewing	0.0211685	0.045327	0	0	0	0.0117866	0	0	0	0.00520596	0	0	0	0	0
dietary.zinc	0.0211685	0.045327	0	0	0	0	0	0	0	0	0	0	0	0.00222065	0.00308702
g.protein	0.0211685	0.045327	0	0	0	0	0	0	0	0	0.00570106	0	0.00353366	0	0
gastrin	0.0211685	0.045327	0.0136856	0	0	0	0.0069697	0	0	0	0	0	0	0	0
nitrite	0.0211685	0.045327	0	0	0	0.0117866	0	0	0	0	0	0.00332597	0	0	0
pasta	0.0211685	0.045327	0	0	0.0149614	0	0	0	0	0	0	0	0.00431338	0	0
pentanoic.acid	0.0211685	0.045327	0	0	0	0	0	0	0	0	0	0	0	0.00444129	0.00207486
ofg	0.0212613	0.045327	0	0	0	0	0	0	0	0	0.00486618	0.00426721	0.00311891	0.0104745	0.00165837
phosphate	0.0214386	0.045327	0.0120516	0.00358423	0.00595238	0	0	0.0121368	0.00962396	0	0	0.0172166	0.010601	0.00234582	0.0041926
metalloproteinases	0.0215382	0.045327	0	0	0	0	0	0	0	0	0	0	0.00311891	0.00222065	0
p.cresol	0.0215382	0.045327	0	0	0	0	0	0	0	0	0	0	0.00311891	0.00222065	0
phenylalanine	0.0215382	0.045327	0	0	0	0	0	0	0	0	0.00481836	0	0.00353366	0	0
cholate	0.0216628	0.045327	0	0	0	0	0	0	0	0	0.00570106	0.00648943	0	0	0
l.carnitine	0.0216628	0.045327	0	0	0	0	0	0	0	0	0	0.00426721	0.00431338	0	0
nonanoate	0.0216628	0.045327	0	0	0	0	0	0	0	0	0	0	0	0.00222065	0.00207486
p.coumaric.acid	0.0216628	0.045327	0	0	0	0	0	0	0	0	0	0	0	0.00222065	0.00207486
pufa.eicosapentaenoic.acid	0.0221113	0.0460154	0.00392157	0	0.0149614	0	0.0128177	0.00769231	0.00962396	0	0	0.00537096	0.00548297	0.00234582	0.00308702
Table_S2C (IBS)
	Kruskal-Wallis test		Mean Expression
Terms	P Value	Adjusted P Value (Padj)	1991 - 1992	1993 - 1994	1995 - 1996	1997 - 1998	1999 - 2000	2001 - 2002	2003 - 2004	2005 - 2006	2007 - 2008	2009 - 2010	2011 - 2012	2013 - 2014	2015 - 2016
3.hydroxybutyric.acid	0.000157781	0.00145762	0	0	0	0	0	0	0	0	0	0.0110925	0	0	0
alpha.1.antitrypsin	0.000157781	0.00145762	0	0	0	0	0	0	0	0	0	0	0	0	0.00310516
bilirubin	0.000157781	0.00145762	0	0	0	0	0	0	0	0	0	0	0	0	0.00521826
bone.mineralization	0.000157781	0.00145762	0	0	0	0	0	0	0	0	0	0.0110925	0	0	0
cholinesterase	0.000157781	0.00145762	0	0	0	0	0	0	0	0	0	0	0	0	0.00310516
conjugated.linoleic.acid	0.000157781	0.00145762	0	0	0	0	0	0	0	0.0144819	0	0	0	0	0
dyslipidemia	0.000157781	0.00145762	0	0	0	0	0	0	0	0	0	0	0	0	0.00620027
een	0.000157781	0.00145762	0	0	0	0	0	0	0	0	0	0	0	0	0.00310516
ferritin	0.000157781	0.00145762	0	0	0	0	0	0	0	0	0	0	0	0	0.00415668
glucose.homeostasis	0.000157781	0.00145762	0	0	0	0	0	0	0	0	0	0	0	0.00507739	0
glucose.transporter	0.000157781	0.00145762	0	0	0	0	0	0	0	0	0	0	0	0	0.00514875
glutathione	0.000157781	0.00145762	0	0	0	0	0	0	0	0	0	0	0	0	0.00514875
glutathione.peroxidase.activity	0.000157781	0.00145762	0	0	0	0	0	0	0	0	0	0	0	0	0.00310516
grape	0.000157781	0.00145762	0	0	0	0	0	0.0200388	0	0	0	0	0	0	0
growth.factors	0.000157781	0.00145762	0	0	0	0	0	0	0	0	0	0	0	0	0.00310516
growth.plates	0.000157781	0.00145762	0	0	0	0	0	0	0	0	0	0	0	0	0.00310516
hyperbilirubinemia	0.000157781	0.00145762	0	0	0	0	0	0	0	0	0	0	0	0.00507739	0
iceberg	0.000157781	0.00145762	0	0	0	0	0	0	0	0	0	0	0	0.00507739	0
insulin.like.growth.factor	0.000157781	0.00145762	0	0	0	0	0	0	0	0	0	0	0	0	0.00310516
insulin.like.growth.factor.binding	0.000157781	0.00145762	0	0	0	0	0	0	0	0	0	0	0	0	0.00310516
intestinal.fatty.acid.binding.protein	0.000157781	0.00145762	0	0	0	0	0	0	0	0	0	0	0	0	0.00310516
kiwifruit	0.000157781	0.00145762	0	0	0	0	0	0	0	0	0	0.0110925	0	0	0
lipoprotein.lipase	0.000157781	0.00145762	0	0	0	0	0	0	0	0	0	0	0	0	0.00310516
prealbumin	0.000157781	0.00145762	0	0	0	0	0	0	0	0	0	0	0	0	0.00621032
proanthocyanidins	0.000157781	0.00145762	0	0	0	0	0	0	0	0	0	0	0	0	0.00310516
pufa.eicosapentaenoic.acid	0.000157781	0.00145762	0	0	0	0	0	0	0	0	0	0	0	0	0.00415668
salmon	0.000157781	0.00145762	0	0	0	0	0	0	0	0	0	0	0	0	0.00310516
silicate	0.000157781	0.00145762	0	0	0	0	0	0	0	0	0.0126514	0	0	0	0
docosahexaenoic.acid	0.000158137	0.00145762	0	0	0	0	0	0	0	0	0	0	0	0.00507739	0.010367
eicosapentaenoic.acid	0.000158137	0.00145762	0	0	0	0	0	0	0	0	0	0	0	0.00507739	0.00310516
monosaccharide	0.000169339	0.00145762	0	0	0	0	0	0	0	0	0	0	0	0.00639492	0.0104466
niacin	0.000169339	0.00145762	0	0	0	0	0	0	0.0222463	0.0144819	0	0	0	0	0
riboflavin	0.000170152	0.00145762	0	0	0	0	0	0	0	0	0	0	0.00844644	0.00804508	0.00310516
body.fat	0.000172679	0.00145762	0	0	0	0	0	0	0	0	0	0	0	0.00507739	0.00824386
fatty.liver.disease	0.000185199	0.00151863	0	0	0	0	0	0	0	0	0	0.0110925	0	0.00982214	0.00508929
lipid.metabolism	0.000283048	0.00225652	0	0	0	0	0	0.0200388	0	0	0	0.0110925	0.00844644	0.00507739	0.00204359
rye	0.000478467	0.00371135	0	0	0	0	0	0	0	0	0	0	0.0109527	0.00804508	0.00205363
wheat.allergy	0.000504409	0.00380961	0	0	0	0	0	0	0	0	0	0	0.00677977	0.0193905	0.0320838
phosphorus	0.000535735	0.0039123	0	0	0	0	0	0	0	0	0	0.0110925	0.00417293	0	0.0114386
vitamin.c	0.000545268	0.0039123	0	0	0	0	0	0	0.0222463	0	0.00411523	0	0.0210658	0	0
vitamin.d	0.00064165	0.00449155	0	0	0	0	0	0	0	0.00383142	0	0	0.0167923	0	0.0166167
fructans	0.000881669	0.00551526	0	0	0	0	0	0	0	0.0144819	0.00853613	0.0191235	0.00417293	0.00969525	0.0154764
food.products	0.00092585	0.00551526	0	0	0	0	0.010101	0.0200388	0.0222463	0	0	0.022185	0.0101131	0.00507739	0.00310516
digestion	0.000942338	0.00551526	0	0	0	0	0	0.0200388	0.0222463	0	0.0243473	0.0187837	0.0092735	0.0427288	0.0133432
potassium	0.000943123	0.00551526	0	0	0	0	0	0	0	0.00383142	0	0	0.0168929	0.00507739	0
spice	0.000944913	0.00551526	0	0	0	0	0	0	0	0	0	0	0.0102137	0.00850462	0.00310516
apple	0.000960847	0.00551526	0	0	0	0	0	0.0200388	0	0	0	0	0	0.00296769	0
carbohydrate.fermentation	0.000960847	0.00551526	0	0	0	0	0	0	0	0	0	0	0.00844644	0	0.00205363
carotene	0.000960847	0.00551526	0	0	0	0	0	0	0	0	0	0	0.00844644	0.00296769	0
glucose.metabolism	0.000960847	0.00551526	0	0	0	0	0	0	0	0	0	0	0	0.00507739	0.00204359
gastrin	0.0011207	0.0063067	0	0	0	0	0	0	0	0	0	0	0.00166667	0.00507739	0.00310516
carbohydrate.metabolism	0.0012407	0.00684771	0	0	0	0	0	0	0	0	0	0	0	0.00296769	0.00838288
low.fat	0.00129582	0.00690757	0	0	0	0	0.0413322	0.010515	0	0	0	0	0	0.00507739	0.0021131
vitamin.e	0.00131969	0.00690757	0	0.0133333	0	0	0	0	0	0	0	0	0.0168929	0.00507739	0
vitamin.a	0.00139475	0.00690757	0.0555556	0	0	0	0	0	0.0222463	0	0.0184993	0.0168087	0.0167923	0.00804508	0.00310516
tgf.beta	0.00139711	0.00690757	0	0	0	0	0	0	0	0	0	0	0.0042735	0.00507739	0.00415668
obesity	0.00140137	0.00690757	0	0	0.0441595	0	0	0.0250893	0.0103415	0	0	0.0429437	0.0787128	0.0495833	0.0672117
phosphate	0.00140694	0.00690757	0.0833333	0	0	0	0	0	0	0	0	0	0	0	0.00106157
niddm	0.00142002	0.00690757	0	0	0	0	0	0	0	0	0.00584795	0	0	0.00639492	0.00625973
soy	0.00158945	0.00760287	0.0833333	0	0	0	0	0	0	0	0.0068034	0	0.00417293	0.00296769	0.0164484
guar	0.00178951	0.00837193	0	0	0	0	0	0.02103	0.0222463	0.0212119	0.0068034	0	0	0.00804508	0.00621032
leptin	0.00180857	0.00837193	0	0	0	0	0	0	0	0	0.00853613	0	0	0.00507739	0
beta.galactosidase	0.00183942	0.00837957	0	0	0	0	0	0.00505051	0	0	0.0153395	0	0	0	0
albumin	0.00200294	0.00898195	0.0833333	0	0	0	0.01911	0	0	0	0.00584795	0	0	0	0.00514875
vitamin.b2	0.00218481	0.00964676	0	0	0	0	0	0	0	0	0.0068034	0.0110925	0.00417293	0	0.00615086
fruit.juices	0.00234331	0.0100377	0	0	0	0	0	0.0200388	0	0	0.0068034	0	0	0.00296769	0
magnesium	0.00234331	0.0100377	0	0	0	0	0	0	0.0222463	0	0.0068034	0	0.00417293	0	0
growth	0.00264984	0.0111839	0.0833333	0	0	0	0	0.0250893	0.0339105	0.0434457	0.0406422	0.0432835	0.0371191	0.021754	0.0227876
caffeine	0.00286208	0.0116475	0	0.0355556	0	0.0462165	0	0.0200388	0	0	0.0068034	0.00231481	0.00844644	0	0.00415668
banana	0.00300319	0.0116475	0	0	0	0	0	0	0	0.00289855	0	0	0	0	0.00310516
cereal	0.00300319	0.0116475	0	0	0	0	0	0	0	0	0.00268817	0	0	0.00507739	0
cholesterol.diet.fed	0.00300319	0.0116475	0	0	0	0	0	0.00505051	0	0	0	0	0	0	0.00621032
lipase	0.00300319	0.0116475	0	0	0	0	0	0.00952381	0	0	0	0	0	0	0.00514875
pyy	0.00300319	0.0116475	0	0	0	0	0	0	0	0.00383142	0	0	0	0	0.00515879
curcumin	0.00309399	0.0118397	0	0	0	0	0	0	0	0	0	0.00571618	0.0102137	0.00850462	0.00514875
ghrelin	0.00317878	0.0120041	0	0	0	0	0	0	0	0	0	0.00571618	0.00417293	0.00639492	0.00310516
vitamin.b	0.00334935	0.0124839	0	0	0	0	0	0	0	0.00672997	0	0	0.00844644	0	0.00205363
vitamin.b12	0.00358729	0.0131067	0	0	0	0	0	0	0.0222463	0.00383142	0	0	0	0.00296769	0
plant	0.00360776	0.0131067	0	0	0	0	0	0	0.0119048	0.0386814	0.0068034	0.00803099	0.00844644	0.0229446	0.0237797
sucrose	0.00379704	0.0133465	0	0	0	0.0114943	0.0402402	0.0200388	0	0	0	0	0	0.0071871	0.00721243
lactose	0.00380314	0.0133465	0.0555556	0.0965079	0.262108	0.113266	0.133006	0.0556431	0.0752766	0.0279418	0.0433304	0.0774389	0.0151256	0.0541448	0.0268555
pasta	0.0038133	0.0133465	0	0	0	0	0	0	0	0	0.0068034	0	0	0.00507739	0.00205363
fructose	0.00442499	0.0153009	0.0555556	0	0	0	0.136118	0.0445509	0	0.0318624	0.0109186	0.0339572	0.0319179	0.0537463	0.0238894
cholesterol	0.00484245	0.016545	0.15	0	0	0	0	0.0451281	0.0220058	0.0114943	0	0.00571618	0.0118803	0.0122645	0.0104265
ffq	0.00586888	0.0195857	0	0	0	0	0	0	0	0	0	0	0.00417293	0.00296769	0.00310516
maize	0.00586888	0.0195857	0	0	0	0	0	0	0.0103415	0	0.0068034	0	0	0	0.00310516
wheat	0.00604726	0.019949	0	0.176508	0	0.0507663	0	0.0155655	0.020683	0.0519632	0.00268817	0.0148337	0.0209652	0.0461608	0.0526696
glutamine	0.00615795	0.0200833	0	0	0	0	0	0	0.0103415	0.00672997	0.0126514	0.00571618	0	0	0.00415668
folate	0.00622997	0.0200899	0	0	0	0	0	0.00952381	0	0.00383142	0.0126514	0	0.00844644	0.00850462	0.0030457
soybean	0.00655254	0.0207642	0	0	0	0	0	0	0	0.0241104	0.00537634	0.00537634	0.00166667	0.00507739	0
fruit	0.00660261	0.0207642	0	0.0355556	0.0185185	0	0	0.0200388	0.015392	0	0.0457129	0.00462963	0.0503769	0.0360671	0.0393256
bile.acid	0.00665611	0.0207642	0	0	0	0	0.0413322	0	0.0257335	0.00672997	0.0068034	0.0110925	0.0134464	0.00969525	0.0155551
alkaline.phosphatase	0.00821272	0.0252387	0	0	0	0	0	0	0	0.00383142	0	0	0	0.00342723	0.00521826
fermentation	0.00826632	0.0252387	0	0	0.0555556	0.0462165	0	0.0556431	0.0222463	0.0125271	0.0438142	0.0244999	0.0387857	0.0241352	0.0433039
transferrin	0.0084271	0.0254587	0	0	0	0	0.01911	0	0	0.00383142	0	0	0	0	0.00726184
fibre	0.0100034	0.0294474	0.361111	0.0488889	0.162393	0.143199	0.0764401	0.150529	0.145984	0.0655014	0.110103	0.0652598	0.074688	0.0753123	0.0464392
capsaicin	0.0100128	0.0294474	0	0	0	0	0	0	0	0.00775194	0.00584795	0.0110925	0.0143866	0	0.00105152
cholestyramine	0.0101289	0.0294474	0.0277778	0	0	0	0	0	0	0.00289855	0	0.0198702	0	0	0.00316462
mannitol	0.0101578	0.0294474	0	0	0	0.0114943	0	0	0	0	0.0068034	0	0.00250627	0.0122645	0.00515879
fatty.acids	0.0105891	0.0303908	0	0	0.0555556	0.0462165	0.0725635	0.0445509	0	0.0289638	0.016295	0.0103458	0.0092735	0.0186594	0.0227776
butyrate	0.0115844	0.0329179	0	0	0.0555556	0	0.0413322	0	0	0	0.00853613	0.00803099	0.0066792	0.00507739	0.0123712
digestive.tract	0.01229	0.0329921	0	0	0	0	0	0.0151515	0	0	0.0153395	0.0148337	0.0261664	0.00896416	0.00204359
atherosclerosis	0.0129207	0.0329921	0	0	0	0	0	0	0	0.00383142	0	0	0.0102137	0.0119318	0.00106157
metabolism	0.0140572	0.0329921	0	0	0	0.0208333	0.010101	0.0149883	0.00505051	0.0134599	0.0366929	0.062407	0.0160533	0.0402865	0.0259422
peppermint	0.0141084	0.0329921	0.0277778	0	0	0	0	0	0	0.0106505	0.0126514	0.00571618	0	0	0.00205363
lactose.intolerance	0.0150218	0.0329921	0	0.0266667	0.0185185	0.0948276	0.0413322	0.0811464	0.0444925	0.0134599	0.0221429	0.0214383	0.0151256	0.0261839	0.0104566
probiotic	0.0160376	0.0329921	0	0	0	0	0	0.0255033	0.0169553	0.0154256	0.0107527	0.030216	0.0252262	0.00527009	0.0163889
anaemia	0.0165544	0.0329921	0	0	0	0	0	0	0.0224868	0.0288747	0.0109186	0.00571618	0.00166667	0.00461785	0.00521826
acetic.acid.propionic.acid	0.0166685	0.0329921	0	0	0	0	0	0	0	0	0	0	0	0	0.00204359
adipogenesis	0.0166685	0.0329921	0	0	0	0	0	0	0	0	0	0	0	0	0.00204359
alanine	0.0166685	0.0329921	0	0	0	0	0	0	0	0.00672997	0	0	0	0	0
arachidonic.acid	0.0166685	0.0329921	0	0	0	0	0	0	0	0	0	0	0	0	0.0021131
berries	0.0166685	0.0329921	0	0	0	0	0	0	0	0	0	0	0.00417293	0	0
beta.lactoglobulin	0.0166685	0.0329921	0	0	0	0	0	0	0	0	0	0	0	0.00296769	0
cabbage	0.0166685	0.0329921	0.0277778	0	0	0	0	0	0	0	0	0	0	0	0
choline	0.0166685	0.0329921	0	0	0	0	0	0	0	0	0	0	0	0.00342723	0
cyanocobalamin	0.0166685	0.0329921	0	0	0	0	0	0	0	0	0	0	0	0	0.00205363
docosapentaenoic.acid	0.0166685	0.0329921	0	0	0	0	0	0	0	0	0	0	0	0	0.0021131
fatty.acid.oxidation	0.0166685	0.0329921	0	0	0	0	0	0	0	0	0	0	0	0	0.0021131
fructose.diet.induced	0.0166685	0.0329921	0	0	0	0	0.0312312	0	0	0	0	0	0	0	0
g.fat	0.0166685	0.0329921	0	0	0	0	0	0	0	0	0	0	0	0	0.0021131
galactose	0.0166685	0.0329921	0	0	0	0	0	0	0	0	0	0.0087777	0	0	0
gamma.linolenic.acid	0.0166685	0.0329921	0	0	0	0	0	0	0	0	0	0	0	0	0.00422619
glucagon	0.0166685	0.0329921	0	0	0	0	0	0	0	0	0	0.00769116	0	0	0
glucose.uptake	0.0166685	0.0329921	0	0	0	0	0	0	0	0	0	0	0	0	0.00408718
glycosylation	0.0166685	0.0329921	0	0	0	0	0	0	0	0	0	0	0	0.00342723	0
hypoglycaemia	0.0166685	0.0329921	0	0	0	0	0	0	0	0	0.0109186	0	0	0	0
iodine	0.0166685	0.0329921	0	0	0	0	0	0	0	0	0	0	0	0	0.00205363
iron.binding	0.0166685	0.0329921	0	0	0	0	0	0	0	0	0	0	0	0	0.00204359
isoflavone	0.0166685	0.0329921	0	0	0	0	0	0	0	0	0	0	0	0	0.00408718
l.thyroxin	0.0166685	0.0329921	0	0	0	0	0	0	0	0	0	0	0	0	0.00205363
malondialdehyde	0.0166685	0.0329921	0	0	0	0	0	0	0	0	0	0	0	0	0.00204359
metalloproteinases	0.0166685	0.0329921	0	0	0	0	0	0	0	0	0	0	0	0	0.00204359
nitric.oxide.synthase	0.0166685	0.0329921	0	0	0	0	0	0	0	0	0	0	0	0	0.00204359
oats	0.0166685	0.0329921	0	0	0	0	0	0	0	0	0	0	0.00677977	0	0
plantago.ovata	0.0166685	0.0329921	0	0	0	0	0	0	0	0	0	0.00571618	0	0	0
pollen	0.0166685	0.0329921	0	0.0698413	0	0	0	0	0	0	0	0	0	0	0
selenoprotein.p	0.0166685	0.0329921	0	0	0	0	0	0	0	0	0	0	0	0	0.00204359
spaghetti	0.0166685	0.0329921	0	0	0	0	0	0	0	0	0.0068034	0	0	0	0
stearic.acid	0.0166685	0.0329921	0	0	0	0	0	0	0	0	0	0	0	0.00375987	0
superoxide.dismutase.activity	0.0166685	0.0329921	0	0	0	0	0	0	0	0	0	0	0	0	0.00204359
tgf.beta1	0.0166685	0.0329921	0	0	0	0	0	0	0	0	0	0	0	0.00593538	0
titanium	0.0166685	0.0329921	0	0	0	0	0	0	0	0	0	0	0	0	0.0030457
tomato	0.0166685	0.0329921	0	0	0	0	0	0	0	0.0134599	0	0	0	0	0
xylose	0.0166685	0.0329921	0	0	0	0	0	0	0	0	0	0	0	0	0.00205363
sorbitol.solution	0.0176946	0.0347146	0.0555556	0	0	0.0253831	0.0815725	0.00546448	0	0.00289855	0	0.0114324	0	0.0139805	0.00310516
gliadin	0.0177807	0.0347146	0	0	0.0740741	0	0	0	0.00529101	0	0.00411523	0.00571618	0.0202387	0.0129956	0.0073414
tryptophan	0.0193873	0.0375956	0	0	0	0.0208333	0.0312312	0.0299766	0	0.0144819	0	0.0110925	0	0.00639492	0.00317467
triacylglycerol	0.0197309	0.0380052	0.0666667	0	0	0	0	0.010515	0	0.00383142	0	0	0	0.0122645	0.0021131
calcium	0.0202515	0.0384516	0.0833333	0.0952381	0	0.0253831	0	0.00546448	0.0598846	0.0250433	0.0068034	0.0137472	0.0192986	0.0110128	0.0155358
acetylcholine	0.0211685	0.0384516	0	0	0	0	0	0	0	0	0	0	0	0.00474475	0.00303565
linoleic.acid	0.0211685	0.0384516	0	0	0	0	0	0	0	0	0	0	0.00417293	0	0.0021131
lipolysis	0.0211685	0.0384516	0	0	0	0	0	0	0	0.00672997	0	0	0	0	0.00408718
lysine	0.0211685	0.0384516	0	0	0	0	0	0	0	0.00672997	0	0	0	0	0.0021131
peanut.allergy	0.0211685	0.0384516	0	0	0	0	0	0	0	0	0	0	0	0.00296769	0.00205363
peas	0.0211685	0.0384516	0	0	0	0	0	0	0	0	0.0068034	0	0	0	0.00204359
pyridoxine	0.0211685	0.0384516	0	0	0	0	0	0	0	0	0	0	0	0.00296769	0.00410727
white.adipose.tissue	0.0211685	0.0384516	0	0	0	0	0	0	0	0	0	0	0	0.00342723	0.00204359
short.chain.fatty.acids	0.0216326	0.038978	0	0	0	0.0208333	0	0.0200388	0.0103415	0	0.0068034	0.00231481	0.00166667	0.00804508	0.00416673
selenium	0.0217299	0.038978	0	0	0	0.0138889	0	0.010515	0	0	0.0121797	0	0	0	0.00825391
pigs	0.0223746	0.0398852	0	0	0	0	0.010101	0	0	0.0144819	0.00268817	0	0	0	0.000992063
potato	0.0242659	0.0429896	0	0.0355556	0	0	0	0	0	0.0134599	0.0068034	0	0.00417293	0	0.00310516
l.tryptophan	0.0247139	0.0435147	0	0	0	0	0	0.0149883	0.00529101	0.00672997	0	0.0110925	0	0	0.000992063
starch	0.0252178	0.0441311	0	0	0.0555556	0.0253831	0.0413322	0.0200388	0.0169553	0.00672997	0.00949157	0	0	0	0.0102581
eating.behaviours	0.0257045	0.0447103	0	0	0	0	0	0.00546448	0	0.00672997	0.00411523	0	0.00677977	0.0121376	0.00521826
chewing	0.0274598	0.0473818	0.0277778	0	0	0	0	0	0.0103415	0	0	0	0.00677977	0	0
methionin	0.0277899	0.0473818	0	0	0	0	0	0	0	0.00962852	0.0068034	0	0	0.00342723	0
artichoke	0.0278227	0.0473818	0	0	0	0	0	0.0145743	0.0169553	0	0	0	0	0.00296769	0
hyperglycemia	0.0279008	0.0473818	0	0	0	0	0	0	0	0	0.0068034	0.00769116	0	0	0.0021131
Table_S2D (UC)
	Kruskal-Wallis test		Mean Expression
Terms	P Value	Adjusted P Value (Padj)	1991 - 1992	1993 - 1994	1995 - 1996	1997 - 1998	1999 - 2000	2001 - 2002	2003 - 2004	2005 - 2006	2007 - 2008	2009 - 2010	2011 - 2012	2013 - 2014	2015 - 2016
banana	0.000156717	0.00318594	0	0	0	0	0	0	0	0.0264328	0	0	0	0	0
cabbage	0.000156717	0.00318594	0	0	0	0	0	0	0	0.0132164	0	0	0	0	0
d.xylose	0.000156717	0.00318594	0	0	0	0	0	0	0	0.0132164	0	0	0	0	0
delta.lactulose	0.000156717	0.00318594	0	0	0	0	0	0	0	0.0132164	0	0	0	0	0
xylose	0.000157558	0.00318594	0	0	0	0	0	0	0	0.0132164	0	0	0	0	0.00407268
bakeries	0.000157781	0.00318594	0	0	0	0	0	0	0	0	0	0	0	0.0046351	0
carbohydrate.metabolism	0.000157781	0.00318594	0	0	0	0	0	0	0	0	0	0	0.00919486	0	0
carrot	0.000157781	0.00318594	0	0	0	0	0	0	0.0129021	0	0	0	0	0	0
cholinesterase	0.000157781	0.00318594	0	0	0	0	0	0	0	0	0	0	0	0	0.00407268
fruit.juices	0.000157781	0.00318594	0	0	0	0.0195624	0	0	0	0	0	0	0	0	0
oats	0.000157781	0.00318594	0	0	0	0	0	0	0	0	0	0	0	0.00812864	0
protein.energy.malnutrition	0.000157781	0.00318594	0	0	0	0	0	0	0	0	0	0	0.0122252	0	0
retinoic.acid	0.000157781	0.00318594	0	0	0	0	0	0	0	0	0	0	0	0	0.00711994
vitamin.c.transporter	0.000157781	0.00318594	0	0	0	0	0	0	0	0	0	0	0	0.0046351	0
riboflavin	0.000158137	0.00318594	0	0	0	0	0.0178333	0	0	0	0	0	0	0.0046351	0
glucans	0.000163084	0.00318594	0	0	0	0	0	0	0	0	0	0.0083534	0.0146232	0.0046351	0
phosphorus	0.000170152	0.00318594	0	0	0	0	0.0178333	0	0	0	0	0.0083534	0	0.00812864	0
folate.metabolism	0.000172679	0.00318594	0	0	0	0	0	0	0	0	0.0104974	0.0083534	0	0	0
menaquinone.7	0.000172679	0.00318594	0	0	0	0	0	0	0	0	0.0104974	0.0083534	0	0	0
squalene	0.000172679	0.00318594	0	0	0	0	0	0	0	0	0	0	0	0.0046351	0.00407268
vitamin.c	0.00033217	0.00565741	0	0	0	0.0323221	0	0	0	0.0264328	0	0	0.00542838	0.0139053	0
pyridoxine	0.000337298	0.00565741	0	0	0	0	0.0178333	0	0	0	0	0.0083534	0.00731162	0.00812864	0.00226109
cocoa	0.000427394	0.00685333	0	0	0	0.0344952	0.0178333	0	0	0	0	0	0.00239808	0	0.00667044
glutamine	0.000448486	0.00685333	0	0.00694444	0.104572	0.0459276	0	0.0255051	0.0293504	0.0132164	0.00271003	0.023393	0.0257013	0.0104117	0
starch	0.000497402	0.00685333	0	0	0.0557473	0	0.0448896	0	0.0392254	0	0.00340136	0.0120366	0.00188324	0.014374	0.0121207
magnesium	0.000499827	0.00685333	0.0393074	0	0	0.0391249	0.0178333	0.00555556	0	0	0.0104974	0	0	0.0046351	0.00962029
rye	0.000501463	0.00685333	0	0	0.0278737	0	0	0	0.0129021	0	0	0.00350877	0	0	0
glutamine.rich.protein	0.000540725	0.00712599	0	0	0	0	0	0.0334596	0.0258043	0	0.00340136	0	0	0	0
potato	0.000670966	0.00853747	0	0	0	0	0	0	0	0.0357733	0	0	0.00542838	0	0.00407268
protein.digestion	0.000739386	0.00909444	0	0	0	0	0.0178333	0	0.0088371	0	0	0	0	0.0046351	0
potassium	0.000836367	0.00995546	0.0180375	0	0	0.0195624	0	0	0	0	0.0159174	0	0	0.00852851	0.00407268
arginine	0.000905739	0.010428	0	0	0.0278737	0	0.00793651	0	0	0	0	0.010195	0.00731162	0.0046351	0.0144637
carbohydrate.fermentation	0.000960847	0.010428	0	0	0	0	0	0	0	0	0	0	0.00731162	0	0.00328652
safflower	0.000960847	0.010428	0	0	0	0	0.0178333	0	0	0	0	0	0	0.00349355	0
fructans	0.00103014	0.0108606	0	0	0	0	0	0.00972222	0	0.0132164	0.0104974	0	0	0	0
tomato	0.00109808	0.0110806	0	0	0	0.0195624	0	0	0	0.00934045	0	0	0	0	0
obesity	0.00111398	0.0110806	0	0	0	0	0.0165469	0	0	0.00934045	0	0.0137038	0.0353071	0.0259273	0.0405695
butyrate.propionate	0.0012407	0.0110806	0	0	0	0	0.0178333	0	0.00935605	0	0	0	0	0	0
cryptoxanthin	0.0012407	0.0110806	0	0	0	0	0	0	0	0	0	0	0	0.0046351	0.00259776
gamma.linolenic.acid	0.0012407	0.0110806	0	0	0	0.0195624	0	0.0116162	0	0	0	0	0	0	0
propionic.acid	0.00135004	0.0110806	0	0	0	0.00462963	0.0178333	0	0	0	0	0.0083534	0.00731162	0	0.00226109
cck	0.00140694	0.0110806	0	0	0	0.0195624	0	0	0	0	0	0.00350877	0	0	0
cholecystokinin	0.00140694	0.0110806	0	0	0	0.0195624	0	0	0	0	0	0	0	0	0.00147493
tyrosine	0.00140694	0.0110806	0	0	0.0278737	0	0	0	0	0	0	0	0.00239808	0	0
walnuts	0.00140694	0.0110806	0	0	0	0	0.0178333	0	0	0	0	0	0	0	0.00147493
n.acetylcysteine	0.00142002	0.0110806	0	0	0	0	0	0.00555556	0	0	0	0	0	0.0046351	0.00407268
thiamin	0.00142447	0.0110806	0	0	0.0342839	0	0	0.00416667	0	0.0132164	0	0	0	0	0.00226109
glutathione.peroxidase	0.00147559	0.0110806	0	0	0	0.0323221	0	0.0116162	0	0	0	0	0	0.0046351	0.00259776
butyrate	0.00150489	0.0110806	0	0.0619444	0.0342839	0.0633169	0.0927741	0.106313	0.0703207	0.0341848	0.0227201	0.0364166	0.0408394	0.0305624	0.024002
adiponectin	0.00150781	0.0110806	0	0	0	0	0	0	0	0	0.0166087	0.00719201	0	0.00275186	0.00588428
resveratrol	0.00153146	0.0110806	0	0	0	0	0	0	0	0	0	0.00951478	0	0	0.0122181
gum.arabic	0.00160527	0.0113913	0	0	0.00813008	0.0309948	0	0	0	0	0	0	0	0	0
guar	0.00180857	0.0123586	0	0.0341667	0	0	0	0	0	0	0	0	0	0	0.00702254
haem	0.00180857	0.0123586	0	0	0	0	0	0.0116162	0	0	0	0	0	0.00765989	0
lipoic.acid	0.00236817	0.0154663	0	0	0	0	0	0	0	0	0	0	0	0.00161031	0.00407268
vitamin.d.receptor	0.00236817	0.0154663	0	0	0	0	0	0	0	0	0	0	0	0.00188324	0.00633377
soybean	0.00238911	0.0154663	0	0	0	0	0.0316984	0	0	0.00934045	0.00438596	0.0148652	0.0170213	0.00349355	0
hyperhomocysteinemia	0.00282352	0.0176299	0	0	0	0	0	0	0	0	0.00709599	0.0083534	0.00188324	0.0062454	0
soy	0.00290265	0.0176299	0	0	0	0	0.0102576	0	0.0129021	0.00934045	0	0	0.00919486	0.0046351	0
aluminosilicate	0.00300319	0.0176299	0	0	0.0133333	0	0	0	0	0	0	0	0	0.0046351	0
choline	0.00300319	0.0176299	0	0	0	0	0	0	0	0	0	0	0.0030303	0	0.00407268
prealbumin	0.00300319	0.0176299	0	0	0	0.00462963	0	0	0	0	0	0	0	0	0.00633377
short.chain.fatty.acids	0.00300998	0.0176299	0	0.0138889	0.0650844	0.0356244	0.065044	0.0291667	0.0779318	0.00775194	0	0.00350877	0.0146232	0.0163842	0.00328652
cholesterol	0.00323889	0.0186742	0.0573449	0	0	0.0527303	0.0498925	0.0116162	0.0298693	0.0132164	0.0263653	0.0107008	0.00606061	0.00490803	0.0148158
maize	0.00333996	0.0189607	0	0	0	0.0195624	0.0178333	0.0116162	0.00529101	0	0	0	0	0.00349355	0
vitamin.a	0.00341084	0.0190697	0.0414719	0	0.00813008	0.0241921	0	0.0116162	0	0.0186809	0.0104974	0	0.00542838	0.0092702	0.0137904
probiotic	0.00350955	0.0193287	0	0	0	0	0	0.0594697	0.00406504	0.0287203	0.0318901	0.02521	0.0163891	0.0110763	0.00702254
glycine	0.0036854	0.0199987	0.010101	0	0.0278737	0	0.00396825	0	0	0	0	0.0083534	0	0	0
selenium	0.00390282	0.0208716	0.0313709	0	0	0.0255194	0.0280909	0.0157828	0.00935605	0.00934045	0.028782	0	0	0.00698709	0.00814537
cyclooxygenase.2	0.00398563	0.02101	0	0	0.00813008	0	0	0	0	0	0.018976	0.0225383	0.0302762	0.0286792	0.0362201
glutathione.n.acetylcysteine	0.00405984	0.0210997	0	0	0	0	0	0	0.0088371	0	0	0	0	0.00436216	0.00883413
body.fat	0.00480803	0.0246411	0	0	0	0	0.0218016	0	0	0	0	0.00368324	0.00606061	0.00617652	0.0102936
barley	0.00501256	0.0249649	0	0	0	0.0298656	0.0138651	0.0882576	0.0351603	0	0.00340136	0.0118622	0.0200516	0.00698709	0.0103091
cholate	0.00520374	0.0249649	0.0425397	0	0	0	0	0	0.0129021	0	0	0	0.00239808	0	0
manganese	0.00520374	0.0249649	0	0	0	0	0.00396825	0	0	0	0.0104974	0	0	0.00349355	0
alanine	0.0053448	0.0249649	0	0	0.0278737	0	0	0	0	0	0	0.00184162	0.00188324	0	0
calcium.chloride	0.0053448	0.0249649	0.0313709	0	0	0.00680272	0	0	0	0	0	0	0	0	0.00181159
methionin	0.0053448	0.0249649	0	0.0411111	0	0	0	0.00416667	0	0	0	0	0	0.00188324	0
tgf.beta2	0.0053448	0.0249649	0	0	0	0	0	0.0157828	0	0	0	0.003003	0.00239808	0	0
vitamin.b.6	0.00565808	0.0260856	0	0	0	0	0	0	0	0	0.00709599	0.00535039	0	0.0046351	0
catechin	0.00572611	0.0260856	0	0	0	0.0195624	0	0	0	0	0	0.00651177	0.00239808	0	0.00328652
taurine	0.00617201	0.027774	0.0212698	0	0	0	0	0	0	0	0	0.0083534	0.00239808	0	0
calcium	0.00628956	0.027962	0.0551804	0	0.00813008	0.0437545	0.0218016	0.00555556	0.0169672	0.00934045	0.0419399	0.0185484	0.0030303	0.0262692	0.0236499
low.fat	0.00637112	0.0279874	0	0	0.00641026	0	0.0102576	0.0213384	0	0	0	0	0.00731162	0	0.00181159
octanoic.acid	0.00659665	0.0285341	0	0	0	0	0.0178333	0	0	0	0	0.00350877	0	0.00275186	0.00226109
n.6.fatty.acids	0.00668725	0.0285341	0.0180375	0	0	0	0.0178333	0.00972222	0	0.0132164	0.0104974	0	0.0115929	0.0130367	0.00259776
bisulfite	0.00672754	0.0285341	0	0	0	0	0.0280909	0	0.00529101	0.0170924	0.00611139	0.003003	0.00239808	0.00436216	0.00588428
fermentation	0.00682705	0.028627	0	0.0411111	0.0360038	0.0633169	0.055821	0.0227273	0.0169672	0.0264328	0.00778733	0.0250602	0.0359259	0.0155156	0.0147184
vitamin.e	0.00691695	0.0286781	0	0	0	0.0334513	0	0.0116162	0	0.0132164	0.00438596	0.00350877	0.00188324	0.0046351	0.00407268
nitric.oxide	0.00710415	0.029127	0	0	0	0	0.0142258	0.00416667	0	0.00934045	0.00877193	0.0250602	0.0175362	0.0171259	0.029647
vitamin.b12	0.00740076	0.0300097	0	0	0	0.0114324	0.0178333	0.00416667	0.0217392	0	0.00980602	0.0137038	0.0122252	0.0046351	0.00407268
tap.water	0.00762006	0.0305631	0	0	0	0	0	0	0.0134211	0.00546448	0	0	0.0103419	0.0062454	0.000786164
cobalamin.deficiency	0.00810352	0.0321527	0	0	0	0	0	0	0	0	0	0.00350877	0.0103419	0	0.000786164
superoxide.dismutase	0.00842855	0.0330865	0	0	0	0.00462963	0	0	0.0035461	0.00387597	0	0	0.01274	0.0092702	0.0078087
alkaline.phosphatase	0.00858514	0.0333465	0	0.0411111	0.0214634	0.0344952	0.00793651	0.0157828	0.0129021	0.00775194	0	0	0.0133722	0.0118951	0
caffeine	0.00889318	0.0340123	0	0	0	0	0	0	0	0.0132164	0.00438596	0	0	0.00349355	0.00328652
cellulose	0.0089409	0.0340123	0	0.0341667	0	0.0391249	0.0138651	0.0116162	0	0	0	0	0	0.00349355	0.00407268
linoleic.acid	0.0096956	0.0365069	0.00793651	0	0.0377236	0.0241921	0	0	0	0.00387597	0.0314921	0.0137038	0.00542838	0.00954313	0.0107431
oleate	0.00982903	0.0366355	0.0292063	0	0.0214634	0	0	0	0	0	0.00438596	0	0.00731162	0.0046351	0.0107431
metabolism	0.0101716	0.0375334	0.0573449	0.0272222	0.0360038	0.040254	0.0515397	0.00416667	0	0.0280213	0.0230134	0.027582	0.0500343	0.0134365	0.0298264
bile.acid	0.0103373	0.0376996	0.0425397	0	0	0.0309948	0.0498925	0.00972222	0.0609646	0.010929	0.00611139	0.0083534	0.00907748	0	0.00259776
tgf.beta1	0.010421	0.0376996	0	0	0	0	0	0	0	0	0.014192	0.00668624	0.0264375	0.00342466	0.00259776
carotene	0.011236	0.0400146	0	0.0341667	0	0.0208898	0.0280909	0.0157828	0	0	0.0148833	0.00350877	0.0103419	0.00114155	0.00338392
phosphate	0.0112778	0.0400146	0	0	0.00813008	0	0	0	0	0	0.0104974	0.00535039	0.00982708	0	0.00407268
digestion	0.0114571	0.0401186	0	0	0.0214634	0.0195624	0.0356666	0.0157828	0.0129021	0.00546448	0.0175933	0.00350877	0.0103419	0.00275186	0.0155046
acetic.acid.propionic.acid	0.0115246	0.0401186	0	0	0.0214634	0	0.0138651	0	0	0.0132164	0	0	0.0030303	0	0
dyslipidemia	0.0120611	0.0412087	0	0	0	0	0	0	0	0	0	0.00184162	0	0.00188324	0.00564501
salmon	0.0120611	0.0412087	0	0	0	0	0	0	0	0	0.00340136	0.0118622	0.0030303	0	0
fructose	0.0128795	0.0418413	0	0	0	0.0195624	0.00757576	0.0176768	0	0	0	0.0083534	0.00239808	0.00188324	0.00407268
lipid.metabolism	0.0130887	0.0418413	0	0	0	0	0	0	0	0	0.0104974	0.00350877	0.00239808	0.00302479	0
nitric.oxide.synthase	0.0134207	0.0418413	0	0	0	0	0.00396825	0.00555556	0.0222582	0.00546448	0.00778733	0.0160266	0.0030303	0.0251857	0.0218383
muscle	0.0138174	0.0418413	0	0	0	0	0.0218016	0.0143939	0.0035461	0.00387597	0.0166087	0.0138783	0.00845869	0.00503496	0.00417008
superoxide.dismutase.activity	0.0143834	0.0418413	0	0	0.0133333	0	0	0	0	0	0	0	0.00239808	0	0.00554761
food.products	0.0144643	0.0418413	0	0	0	0.0149328	0.011544	0	0	0.00387597	0.0104974	0.0148652	0.00542838	0	0
eicosapentaenoic.acid	0.0146656	0.0418413	0.0771429	0.0202778	0	0.0195624	0	0.0171717	0.0129021	0	0.0280907	0.00350877	0.0030303	0	0
homocysteine	0.0149588	0.0418413	0	0	0	0	0	0.00416667	0.0088371	0	0.00980602	0.00885916	0.0244503	0.00812864	0.000786164
lactulose	0.0149803	0.0418413	0	0	0.0214634	0.0149328	0.00757576	0	0	0.0225569	0	0	0	0.00188324	0.00667044
vitamin.d	0.0150221	0.0418413	0	0	0.00813008	0.0195624	0.0181941	0.0125	0.0240594	0.0232558	0.00778733	0.014384	0.0331304	0.0878048	0.069304
carrageenan	0.0161292	0.0418413	0	0	0.0278737	0.00680272	0	0.00606061	0	0	0	0	0.00239808	0	0
curcumin	0.0164575	0.0418413	0	0	0	0	0	0	0	0	0.0121733	0.00600601	0.00616456	0.0196819	0.0128094
5.methyl.tetrahydrofolate	0.0166685	0.0418413	0	0	0	0	0	0	0.0176742	0	0	0	0	0	0
alpha.lactalbumin	0.0166685	0.0418413	0	0.0341667	0	0	0	0	0	0	0	0	0	0	0
benzoic.acid	0.0166685	0.0418413	0	0.0966667	0	0	0	0	0	0	0	0	0	0	0
bone.matrix	0.0166685	0.0418413	0	0	0	0	0	0	0	0	0	0	0	0.00349355	0
bone.remodeling	0.0166685	0.0418413	0	0	0	0	0	0	0	0	0.00709599	0	0	0	0
calcium.oxalate	0.0166685	0.0418413	0	0	0	0	0	0	0	0.00934045	0	0	0	0	0
canola	0.0166685	0.0418413	0	0	0	0	0	0	0	0	0	0	0	0.00349355	0
dietary.zinc	0.0166685	0.0418413	0	0	0	0	0	0	0	0	0	0	0	0	0.00328652
eating.behaviours	0.0166685	0.0418413	0	0	0	0	0	0	0	0	0	0	0.00428132	0	0
egg.white	0.0166685	0.0418413	0	0	0	0	0	0	0	0.00934045	0	0	0	0	0
growth.plates	0.0166685	0.0418413	0	0	0	0	0	0	0	0	0.00709599	0	0	0	0
hepcidin	0.0166685	0.0418413	0	0	0	0	0	0	0	0	0	0	0	0.00302479	0
hypopituitarism	0.0166685	0.0418413	0	0	0	0	0	0.00972222	0	0	0	0	0	0	0
l.tryptophan	0.0166685	0.0418413	0	0	0	0	0	0	0	0	0	0	0	0.00349355	0
lutein	0.0166685	0.0418413	0	0	0	0	0	0	0	0	0	0	0	0	0.00259776
mannitol	0.0166685	0.0418413	0	0	0	0	0	0	0	0	0	0	0	0	0.00259776
mineralization	0.0166685	0.0418413	0	0	0	0	0	0	0	0	0	0	0	0.00349355	0
morbid.obesity	0.0166685	0.0418413	0	0	0	0	0	0	0	0	0	0	0	0.00302479	0
overnutrition	0.0166685	0.0418413	0	0	0	0	0	0	0.0088371	0	0	0	0	0	0
p.cresol	0.0166685	0.0418413	0	0	0	0	0	0	0	0	0	0	0.00428132	0	0
phosphate.metabolism	0.0166685	0.0418413	0	0	0	0	0	0	0	0	0	0	0	0.00349355	0
response.to.nutrient	0.0166685	0.0418413	0	0	0	0	0	0	0	0	0	0	0	0.00302479	0
selenoprotein.p	0.0166685	0.0418413	0	0	0	0	0	0	0	0.00934045	0	0	0	0	0
serum.ferritin	0.0166685	0.0418413	0	0	0	0	0	0	0	0	0.0121733	0	0	0	0
taste	0.0166685	0.0418413	0	0	0	0	0	0	0.00935605	0	0	0	0	0	0
wheat.allergy	0.0166685	0.0418413	0	0	0	0	0	0	0	0	0	0	0	0	0.00328652
zeaxanthin	0.0166685	0.0418413	0	0	0	0	0	0	0	0	0	0	0	0	0.00259776
glycoproteins	0.0171209	0.0426155	0	0	0	0	0.00396825	0	0	0	0.00438596	0.0083534	0	0	0
copper	0.0172079	0.0426155	0.0313709	0	0.0133333	0.0208898	0.0102576	0	0	0	0.0104974	0	0	0.00349355	0.00147493
lactose.intolerance	0.018382	0.0452196	0	0.0133333	0	0.0114324	0	0.0157828	0.00935605	0	0.0138987	0	0.00919486	0.00114155	0.000786164
malondialdehyde	0.0189581	0.0463282	0	0	0	0	0	0.00606061	0.0129021	0.00934045	0.00438596	0.0130235	0.0126226	0.0127637	0.0337197
insulin	0.0193771	0.0470405	0	0.00694444	0	0	0.0194805	0	0.0346414	0	0.00709599	0.00535039	0.00731162	0.00503496	0.00485885
aloe.vera	0.0211685	0.049343	0	0	0	0	0	0	0	0	0	0	0	0.00349355	0.00952289
chewing	0.0211685	0.049343	0	0	0	0.0149328	0	0	0	0.00934045	0	0	0	0	0
dyspepsia	0.0211685	0.049343	0	0	0	0	0	0	0	0	0	0	0	0.00550372	0.00226109
ferritin	0.0211685	0.049343	0	0	0	0	0	0	0	0	0.00778733	0	0	0	0.00259776
glutathione.reductase	0.0211685	0.049343	0	0	0	0.0149328	0	0	0	0	0	0	0	0	0.00259776
beta.lactoglobulin	0.0213254	0.049343	0.0212698	0.0341667	0	0	0	0	0	0	0	0	0	0	0
berries	0.0215382	0.049343	0	0	0	0	0	0	0	0	0	0	0	0.00349355	0.00328652
nonanoate	0.0215382	0.049343	0	0	0	0	0	0	0	0	0	0	0	0.00275186	0.00226109
pentanoic.acid	0.0215382	0.049343	0	0	0	0	0	0	0	0	0	0	0	0.00275186	0.00226109
osteoclast	0.0216628	0.049343	0	0	0	0	0	0	0	0	0	0.00535039	0.00491354	0	0
