# Supplementary material for: An automated identification and analysis of ontological terms in gastrointestinal diseases and nutrition-related literature provides useful insights
Source: PeerJ. 2018 Jul 26;6:e5047. doi: 10.7717/peerj.5047 (PMC6064635; doi:10.7717/peerj.5047)
Supplement: Supplemental Information 3 [file peerj-06-5047-s003.xlsx]

## Sheet: nutritional_terms
	Nutritional terms
1	3.hydroxybutyric.acid
2	5.hydroxytryptophan
3	5.lipoxygenase
4	5.methyl.tetrahydrofolate
5	acetic.acid
6	acetic.acid.propionic.acid
7	acetylcholine
8	acrodermatitis.enteropathica
9	adipocytes
10	adipogenesis
11	adiponectin
12	alanine
13	albumin
14	alcohol.abuse
15	alcoholism
16	alkaline.phosphatase
17	allergens
18	allergy
19	aloe.vera
20	alpha.1.antitrypsin
21	alpha.amylase
22	alpha.amylase.inhibitor
23	alpha.lactalbumin
24	alpha.linolenic.acid
25	alpha.tocopherol
26	aluminium
27	aluminosilicate
28	amaranth
29	anaemia
30	anorexia.nervosa
31	anthocyanin
32	antioxidant
33	apple
34	arachidonic.acid
35	arginine
36	arsenic
37	artichoke
38	ascites
39	atherosclerosis
40	atlantic.salmon
41	avenin
42	bakeries
43	banana
44	barley
45	benzoic.acid
46	berries
47	beta.catenin
48	beta.galactosidase
49	beta.lactoglobulin
50	bile.acid
51	bilirubin
52	bismuth
53	bismuth.subsalicylate
54	bisulfite
55	body.fat
56	bone.disease
57	bone.formation
58	bone.marrow
59	bone.matrix
60	bone.mineralization
61	bone.remodeling
62	bone.resorption
63	broccoli
64	butyrate
65	butyrate.metabolism
66	butyrate.propionate
67	cabbage
68	caffeine
69	calcitonin
70	calcium
71	calcium.carbonate
72	calcium.chloride
73	calcium.oxalate
74	calcium.phosphate
75	canola
76	capsaicin
77	carbohydrate.fermentation
78	carbohydrate.metabolism
79	carotene
80	carrageenan
81	carrot
82	cassava
83	catechin
84	cck
85	cellobiose
86	cellulose
87	cereal
88	ceruloplasmin
89	chewing
90	cholate
91	cholecystokinin
92	cholelithiasis
93	cholestasis
94	cholesterol
95	cholesterol.diet.fed
96	cholesterol.synthesis
97	cholestyramine
98	choline
99	cholinesterase
100	citrulline
101	cobalamin
102	cobalamin.deficiency
103	cocoa
104	conjugated.linoleic.acid
105	copper
106	coumarin.derivatives
107	cow.milk.allergy
108	creatine.phosphokinase
109	creatinine
110	cryptoxanthin
111	curcumin
112	curcumin.diferulolylmethane
113	cyanocobalamin
114	cyclooxygenase.2
115	cytochrome.p450
116	d.xylose
117	deer
118	delta.lactulose
119	deoxypyridinoline
120	dietary.zinc
121	digestion
122	digestive.tract
123	docosahexaenoic.acid
124	docosapentaenoic.acid
125	durum.wheat
126	dyslipidemia
127	dyspepsia
128	eating.behaviours
129	eating.disorder
130	een
131	egg.white
132	egg.yolk
133	eicosapentaenoic.acid
134	ellagic.acid
135	ellagitannins
136	ethylcellulose
137	evening.primrose.oil
138	fatty.acid.metabolism
139	fatty.acid.oxidation
140	fatty.acids
141	fatty.liver.disease
142	fermentation
143	ferritin
144	ferrous.sulphate
145	ffa2
146	ffq
147	fibre
148	fibrinogen
149	folate
150	folate.metabolism
151	food.allergy
152	food.products
153	fructans
154	fructose
155	fructose.diet.induced
156	fructose.intolerance
157	fruit
158	fruit.juices
159	g.fat
160	g.oats
161	g.protein
162	g.protein.coupled.receptors
163	galactose
164	galactosemia
165	galanin
166	gamma.linolenic.acid
167	garlic
168	gastrin
169	ghrelin
170	ginger
171	gliadin
172	glucagon
173	glucagon.like.peptide.1
174	glucans
175	glucose
176	glucose.homeostasis
177	glucose.metabolism
178	glucose.transporter
179	glucose.uptake
180	glutamic.acid
181	glutamine
182	glutamine.rich.protein
183	glutathione
184	glutathione.n.acetylcysteine
185	glutathione.peroxidase
186	glutathione.peroxidase.1
187	glutathione.peroxidase.activity
188	glutathione.reductase
189	gluten.allergy
190	glycerol
191	glycine
192	glycoproteins
193	glycosylation
194	gpr43
195	grape
196	growth
197	growth.factors
198	growth.plates
199	guar
200	gum.arabic
201	haem
202	haemoglobin
203	hepcidin
204	homocysteine
205	homocysteine.metabolism
206	hydroxypropylmethyl.cellulose
207	hyperbilirubinemia
208	hypercalcemia
209	hyperglycemia
210	hyperhomocysteinemia
211	hyperinsulinemia
212	hyperparathyroidism
213	hypochromic.anemia
214	hypoglycaemia
215	hypogonadism
216	hypokalemia
217	hypoparathyroidism
218	hypophosphatemia
219	hypopituitarism
220	iceberg
221	iddm
222	insulin
223	insulin.like.growth.factor
224	insulin.like.growth.factor.binding
225	intestinal.absorption
226	intestinal.fatty.acid.binding.protein
227	iodine
228	iron.binding
229	iron.deficiency.anemia
230	iron.fe
231	isoflavone
232	isoleucine.leucine
233	kiwifruit
234	l.alanine
235	l.carnitine
236	l.thyroxin
237	l.tryptophan
238	lactate.dehydrogenase
239	lactose
240	lactose.intolerance
241	lactulose
242	lecithin
243	leptin
244	leucine
245	linoleic.acid
246	lipase
247	lipid.metabolism
248	lipid.oxidation
249	lipoic.acid
250	lipolysis
251	lipoprotein.lipase
252	lipoxygenase
253	lipoxygenase.pathways
254	low.density.lipoprotein
255	low.fat
256	lutein
257	lycopene
258	lysine
259	macrocytic.anemia
260	magnesium
261	maize
262	malondialdehyde
263	maltase
264	maltodextrin
265	manganese
266	mannitol
267	mct
268	menaquinone.7
269	metabolism
270	metalloproteinases
271	methionin
272	methylenetetrahydrofolate.reductase
273	milk.allergy
274	mineralization
275	monosaccharide
276	morbid.obesity
277	muscle
278	muscle.wasting
279	n.6.fatty.acids
280	n.acetylcysteine
281	nacl
282	niacin
283	nickel
284	niddm
285	nitrate
286	nitric.oxide
287	nitric.oxide.synthase
288	nitrite
289	nonanoate
290	oats
291	obesity
292	octanoic.acid
293	ofg
294	oleate
295	omega.3.fatty.acids
296	osteoblast
297	osteocalcin
298	osteoclast
299	osteomalacia
300	osteoporosis
301	ovalbumin
302	overnutrition
303	oxalate
304	p.coumaric.acid
305	p.cresol
306	pasta
307	peanut
308	peanut.allergy
309	peas
310	pentanoic.acid
311	pepper
312	peppermint
313	peppermint.oil
314	peptidoglycan
315	peptidoglycan.receptor
316	pernicious.anemia
317	phenylalanine
318	phenylketonuria
319	phosphate
320	phosphate.metabolism
321	phosphatidylethanolamine
322	phosphorus
323	pigs
324	plant
325	plantago.ovata
326	pollen
327	polyethyleneglycol
328	polymer
329	pomegranate
330	potassium
331	potato
332	prealbumin
333	proanthocyanidins
334	probiotic
335	prolactin
336	prolamine
337	propionic.acid
338	proteases
339	protein.catabolism
340	protein.digestion
341	protein.energy.malnutrition
342	protein.losing.enteropathy
343	protein.metabolism
344	protein.tyrosine.phosphatase
345	protein.x
346	pufa.eicosapentaenoic.acid
347	pyridoxal.5.phosphate
348	pyridoxine
349	pyy
350	quercetin
351	quinoa
352	rabbit
353	redox
354	refractory.anemia
355	regulation.of.energy.homeostasis
356	resistin
357	response.to.food
358	response.to.nutrient
359	resveratrol
360	reticulin
361	retinoic.acid
362	retinol.binding.protein
363	rhamnose
364	riboflavin
365	rice
366	rickets
367	rutin
368	rye
369	safflower
370	salmon
371	selenium
372	selenoprotein.p
373	selenoproteins
374	serum.albumin
375	serum.ferritin
376	short.chain.fatty.acids
377	silicate
378	silicon
379	skeletal.muscle
380	skeleton
381	sodium
382	sorbitol.solution
383	sorghum
384	soy
385	soybean
386	spaghetti
387	spice
388	squalene
389	starch
390	stearic.acid
391	steatorrhea
392	strawberry
393	succinic.acid
394	sucralose
395	sucrase
396	sucrose
397	superoxide.dismutase
398	superoxide.dismutase.activity
399	tap.water
400	taste
401	taurine
402	tgf.beta
403	tgf.beta1
404	tgf.beta2
405	thiamin
406	tissue.transglutaminase
407	titanium
408	titanium.dioxide
409	tomato
410	transferrin
411	transferrin.receptor
412	transglutaminase
413	triacylglycerol
414	trypsin
415	tryptophan
416	ttg
417	ttg2
418	tyrosine
419	tyrosine.hydroxylase
420	tyrosine.phosphatase
421	umami.taste.perception
422	ursodeoxycholic.acid
423	valproate
424	vitamin.a
425	vitamin.b
426	vitamin.b.6
427	vitamin.b12
428	vitamin.b2
429	vitamin.c
430	vitamin.c.transporter
431	vitamin.d
432	vitamin.d.receptor
433	vitamin.e
434	vitamin.k
435	vitamin.k.deficiency
436	walnuts
437	wernicke.s.encephalopathy
438	wheat
439	wheat.allergy
440	whipple.s.disease
441	white.adipose.tissue
442	xanthan.gum
443	xenobiotic.metabolism
444	xylose
445	zeaxanthin
